# Supplementary material for: Characteristics of randomized controlled trials of yoga: a bibliometric analysis
Source: PubMed Central journal article supplement (PMC4161862; doi:10.1186/1472-6882-14-328), 2014-09-02
Supplement: 12906_2013_1900_MOESM1_ESM.pdf [file 12906_2013_1900_MOESM1_ESM.pdf]

2488 records identified through database searching

- 902 Pubmed/Medline
- 1141 Scopus
- 399 Cochrane Library
- 46 IndMed

31 additional records identified through other sources

- 16 Journal of Yoga and Physical Therapy
- 5 SENSE
- 10 other sources

1530 records after duplicates removed

1041 records excluded

489 full-text articles assessed for eligibility

123 full-text articles excluded

- 89 no randomized trial
- 19 no yoga intervention
- 15 not fully published

366 full-text articles on 312 RCTs included
