# Supplementary material for: Characteristics of randomized controlled trials of yoga: a bibliometric analysis
Source: PubMed Central journal article supplement (PMC4161862; doi:10.1186/1472-6882-14-328), 2014-09-02

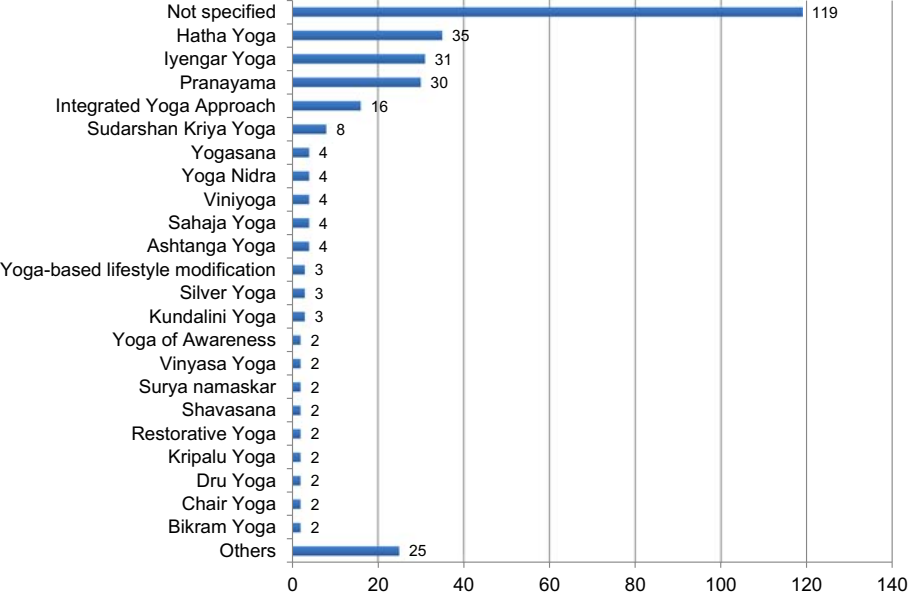

Supplement: 12906_2013_1900_MOESM5_ESM.pdf [file 12906_2013_1900_MOESM5_ESM.pdf]
